# Supplementary material
Source: PubMed Central journal article supplement (PMC2758561)

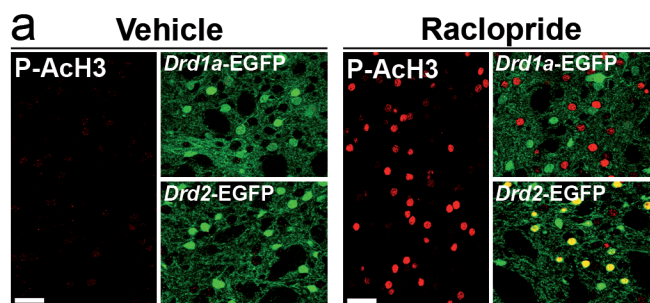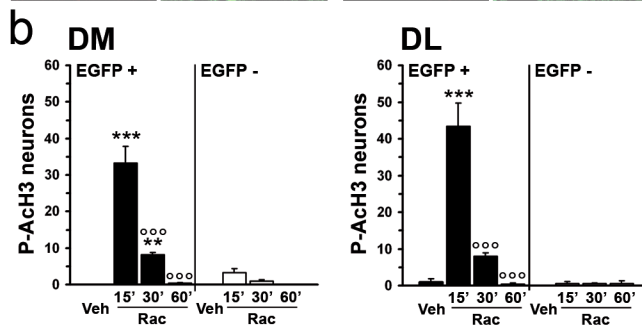

Supplement: NIHMS125456-supplement-Supple_Figure.pdf [file NIHMS125456-supplement-Supple_Figure.pdf]
